# Supplementary material
Source: publisher figshare collection journal article supplement (https://acs.figshare.com/ndownloader/files/20727468)
Supplement: Supplementary file 1 [file 20727468]

# Supporting Information

## Direct Surface Enhanced Raman Spectroscopic Detection of Cortisol at Physiological Concentrations

T. Joshua Moore and Bhavya Sharma\*

Department of Chemistry, The University of Tennessee Knoxville, 1420 Circle Drive, Knoxville, Tennessee 37996, United States

Corresponding author email: bhavya.sharma@utk.edu

### Contents

|                                                                                                                                 |    |
|---------------------------------------------------------------------------------------------------------------------------------|----|
| <b>Figure S1.</b> SEM image of the prepared hydroxylamine-reduced silver nanoparticles. ....                                    | S2 |
| <b>Figure S2.</b> Extinction spectrum of synthesized HA-AgNP. ....                                                              | S2 |
| <b>Figure S3.</b> Structure of methylene blue. ....                                                                             | S2 |
| <b>Figure S4.</b> Sigmoidal SERS concentration response plots for cortisol. ....                                                | S3 |
| <b>Limit of Detection Determination.</b> ....                                                                                   | S4 |
| <b>Figure S5.</b> Linear regression plots for the observed peaks in SERS spectra of cortisol. ....                              | S4 |
| <b>Figure S6.</b> Full experimental and theoretical spectra of cortisol (200 – 4000 $\text{cm}^{-1}$ ).....                     | S5 |
| <b>Figure S7.</b> High wavenumber region of experimental and theoretical spectra of cortisol (2800-3100 $\text{cm}^{-1}$ )..... | S5 |
| <b>Table S1.</b> Theoretical, experimental, and SERS peak positions and vibrational modes for cortisol.....                     | S6 |
| <b>References</b> .....                                                                                                         | S6 |

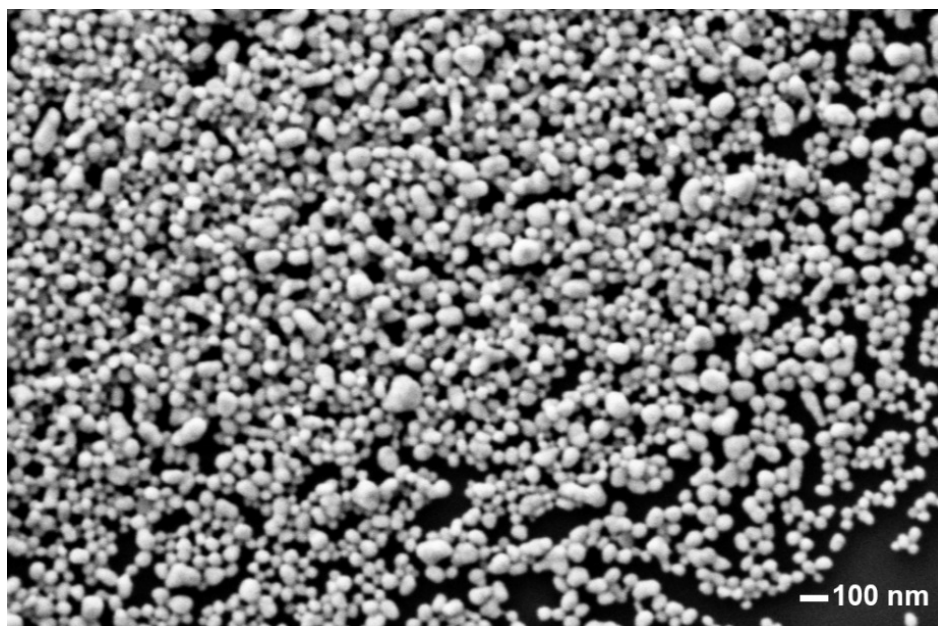

**Figure S1.** SEM image of the prepared hydroxylamine -reduced silver nanoparticles (HA-AgNP), showing good monodispersity and an average diameter of  $\sim 30$  nm.

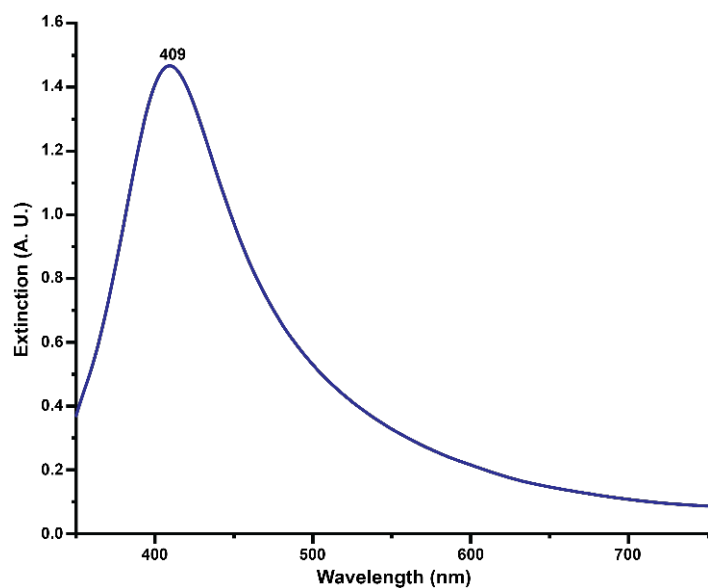

**Figure S2.** Extinction spectrum of synthesized HA-AgNP, showing an LSPR maximum located at 409 nm.

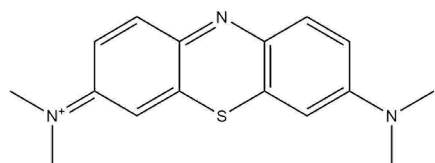

**Figure S3.** Structure of methylene blue

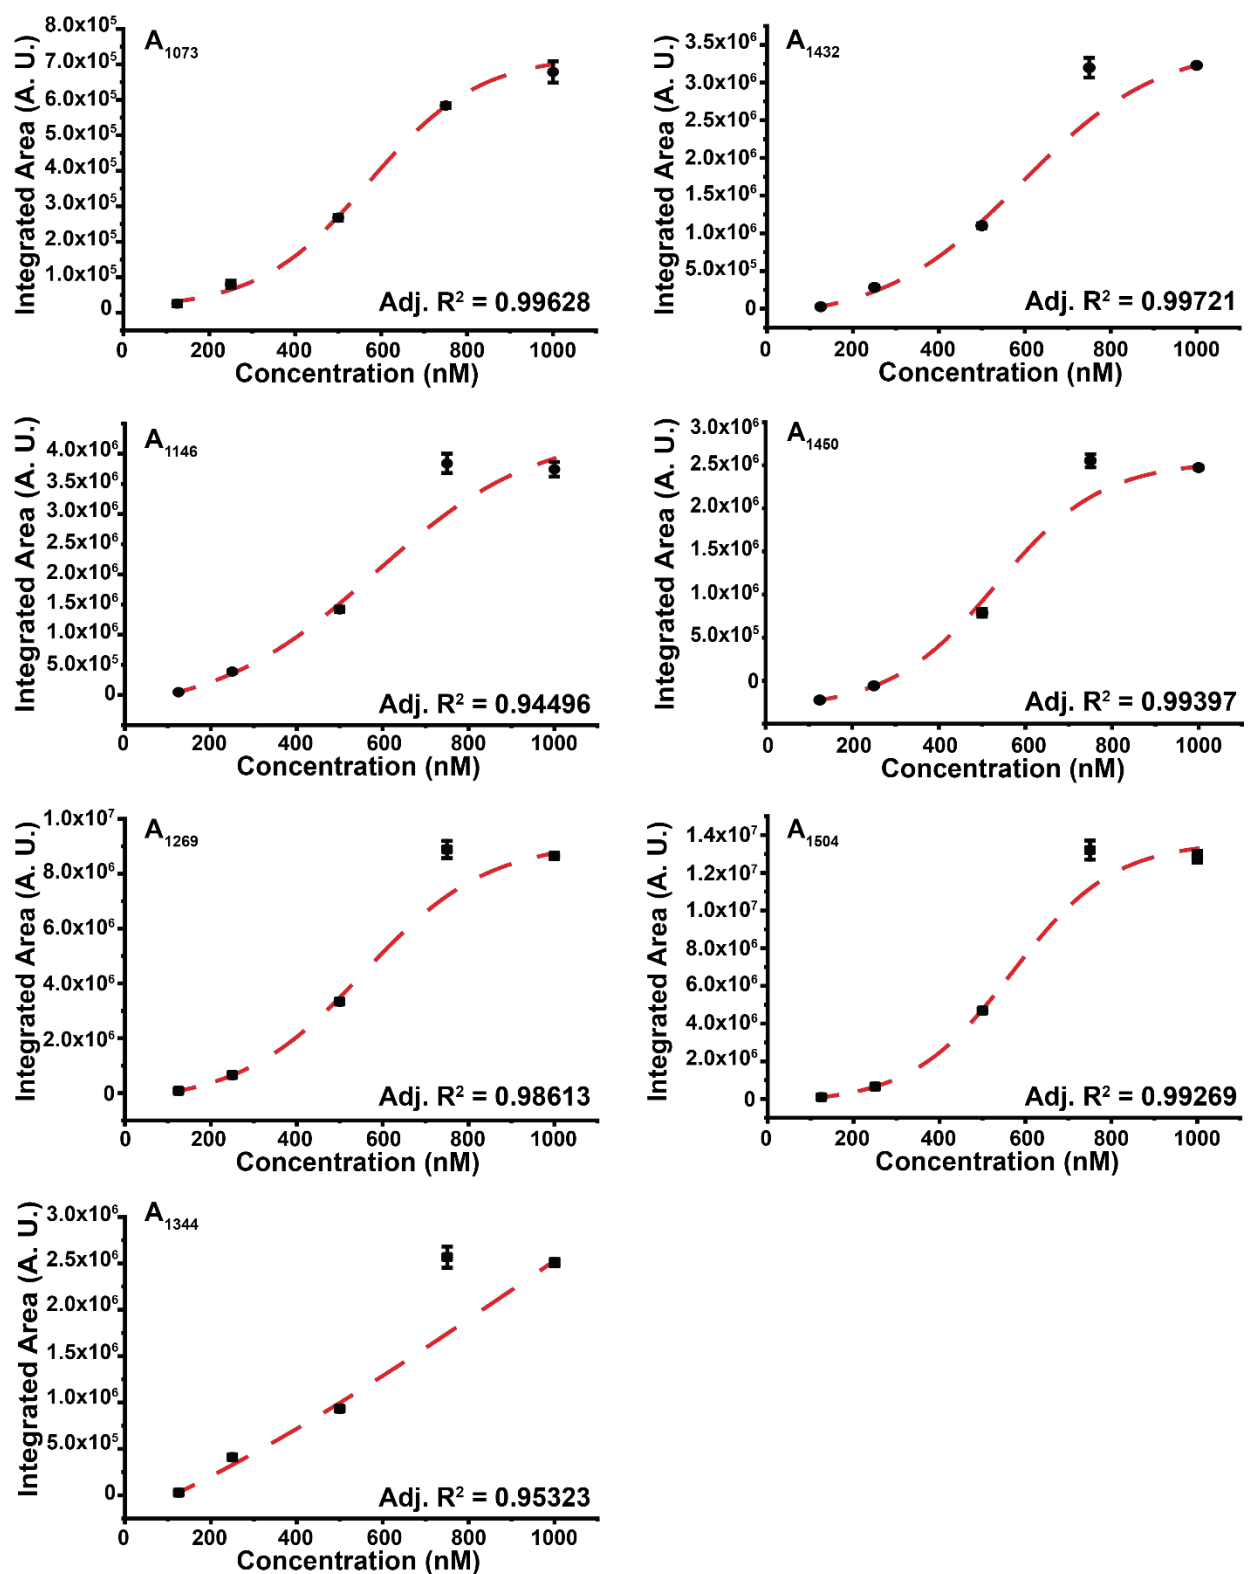

**Figure S4.** Sigmoidal concentration response plots for the observed peaks in SERS spectra of cortisol obtained from samples in the physiological range (125-1000 nM). Error bars are present on all data points, but the small magnitude of some error bars is obscured by the data marker in several instances.

### Limit of Detection (LOD) Determination

The linearity of the concentration response of the SERS spectra was investigated by peak fitting the individual 30 s exposures for each concentration of cortisol. The peaks were fit using GRAMS/AI software (ThermoScientific), and the resultant area values were analyzed statistically. Each peak's mean area was plotted (Origin software) as a function of concentration, and error bars were established as  $\pm 1$  standard deviation from the mean. To determine the limit of detection (LOD) for cortisol, the 1504  $\text{cm}^{-1}$  peak was selected as the peak of interest since it has an  $R^2$  value closer to unity in the linear regression analysis. Three frames at each of the concentrations were collected and the peak area was integrated for each spectrum. The resulting concentration and integrated area data were analyzed using ANOVA, and the standard error of the intercept was calculated. The LOD ( $3.3 \times \text{standard error/slope}$ ) was calculated to be 177 nM, which agrees with visual LOD analysis of  $\sim 200$  nM.

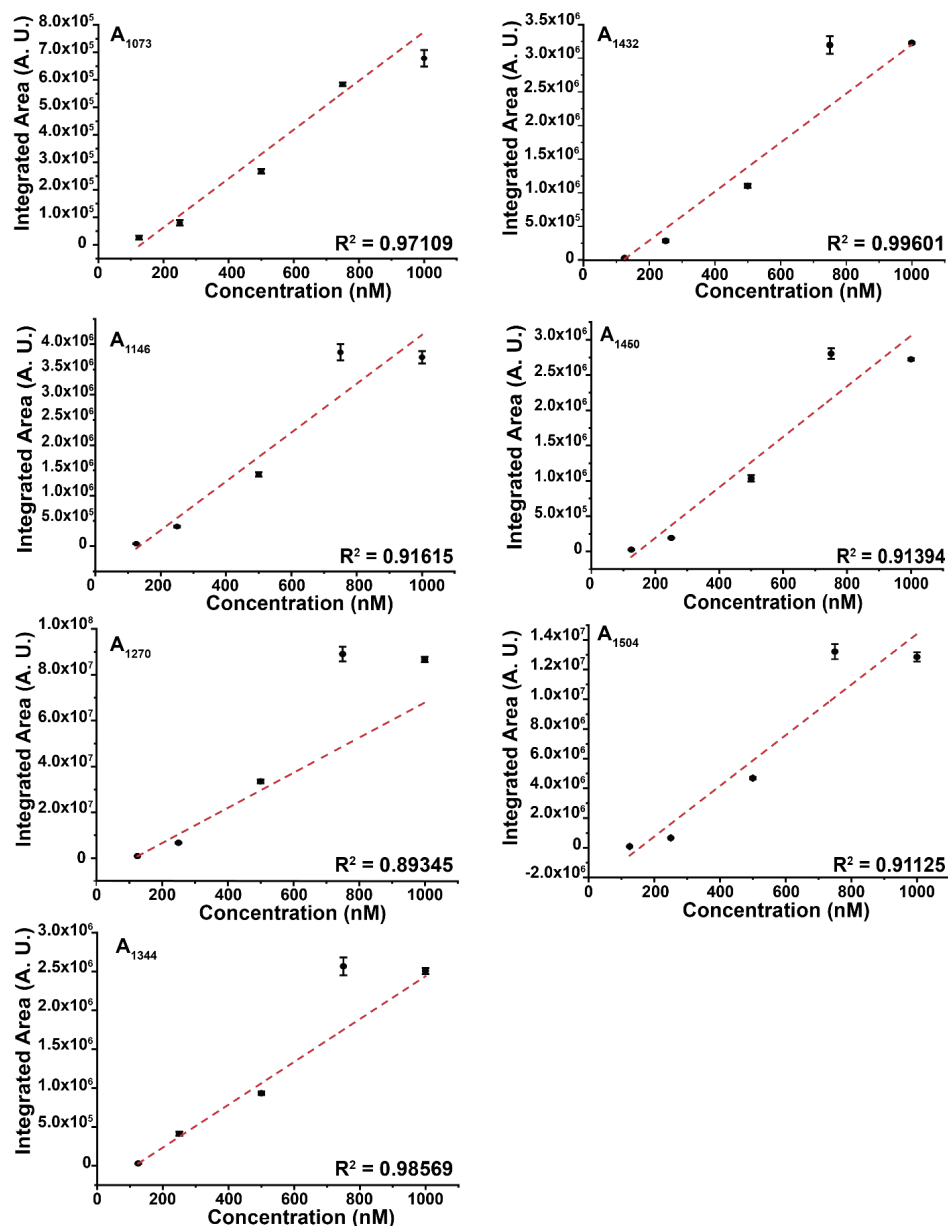

**Figure S5.** Linear regression plots for the observed peaks in SERS spectra of cortisol obtained from samples in the physiological range (125-1000 nM). Error bars are present on all data points, but the small magnitude of some error bars is obscured by the data marker in several instances.

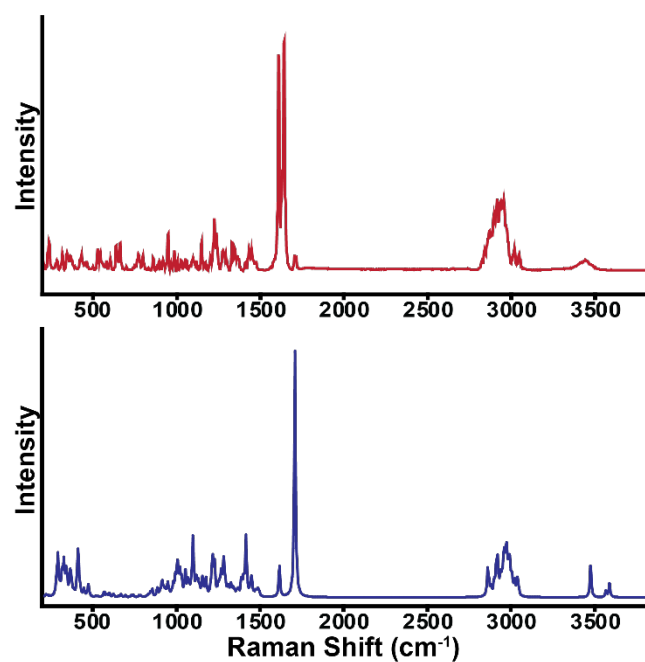

**Figure S6.** Experimental (top, red) and theoretical (bottom, blue) normal Raman spectra for cortisol in the region from 200 – 4000  $\text{cm}^{-1}$ . For the experimental spectrum,  $\lambda_{\text{ex}} = 532 \text{ nm}$ ,  $P = 10 \text{ mW}$ , and  $t = 10 \text{ s}$ .

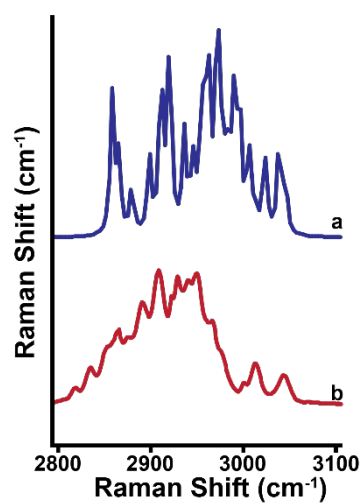

**Figure S7.** Theoretical (a) and experimental (b) normal Raman spectra for cortisol in the high wavenumber region.

**Table S1.** Theoretical normal Raman, experimental normal Raman, and SERS peak positions and vibrational modes for cortisol.

| Theoretical, scaled (cm <sup>-1</sup> ) | Normal Raman, solid (cm <sup>-1</sup> ) | SERS (cm <sup>-1</sup> ) | Vibrational Modes                                                      |
|-----------------------------------------|-----------------------------------------|--------------------------|------------------------------------------------------------------------|
| 1078                                    | 1077                                    | 1073                     | Asymmetric ring breathing (C ring)                                     |
| 1148                                    | 1149                                    | 1146                     | CH <sub>2</sub> twist + CH bend + OH bend                              |
| 1221                                    | 1224                                    | -                        | C-C-C asymmetric stretch (D ring)                                      |
| 1222                                    |                                         |                          | C-C-C asymmetric stretch (A ring)                                      |
| 1242                                    | 1239                                    | -                        | C-C-C asymmetric stretch (C ring)                                      |
| 1270                                    | 1275                                    | 1269                     | CH bend + CH <sub>2</sub> bend + OH bend                               |
| 1332                                    | 1330                                    | -                        | C-C-C asymmetric stretch A ring                                        |
| 1341                                    | 1346                                    | 1344                     | C-C-C symmetric stretch (A ring)                                       |
| 1342                                    |                                         |                          |                                                                        |
| 1381                                    | 1382                                    | 1378                     | CH <sub>3</sub> symmetric bend + CH wag + OH wag (C ring)              |
| 1385                                    | 1390                                    |                          |                                                                        |
| 1435                                    | 1432                                    | 1432                     | CH <sub>2</sub> scissor (A, B rings)                                   |
| 1446                                    | 1448                                    | 1450                     | CH <sub>2</sub> scissor (D ring + pendant)                             |
| 1611                                    | 1609                                    | -                        | C=C stretch                                                            |
| -                                       | -                                       | 1504                     | C=C stretch <sup>1</sup> OR C-C-C asymmetric ring deform. <sup>2</sup> |
| 1704                                    | 1641                                    | -                        | C=O stretch                                                            |

## REFERENCES

1. Patterson, M. L.; Weaver, M. J., Surface-enhanced Raman spectroscopy as a probe of adsorbate-surface bonding: simple alkenes and alkynes adsorbed at gold electrodes. *The Journal of Physical Chemistry* **1985**, *89* (23), 5046-5051.
2. Quester, K.; Avalos-Borja, M.; Vilchis-Nestor, A. R.; Camacho-López, M. A.; Castro-Longoria, E., SERS Properties of Different Sized and Shaped Gold Nanoparticles Biosynthesized under Different Environmental Conditions by *Neurospora crassa* Extract. *PLoS ONE* **2013**, *8* (10).
